# Supplementary material for: Liquid chromatography–tandem mass spectrometry for clinical diagnostics
Source: Springer Nature journal article supplement (doi:10.1038/s43586-022-00175-x), 2022-12-08
Supplement: MOESM1 [file 43586_2022_175_MOESM1_ESM.pdf]

# Liquid chromatography–tandem mass spectrometry for clinical diagnostics

---

In the format provided by the  
authors and unedited

## **Supplementary information**

### **Liquid chromatography-tandem mass spectrometry for clinical diagnostics**

Stefani N. Thomas<sup>1</sup>, Deborah French<sup>2</sup>, Paul J. Jannetto<sup>3</sup>, Brian A. Rappold<sup>4</sup>, and William A Clarke<sup>5\*</sup>

<sup>1</sup> Laboratory Medicine and Pathology, University of Minnesota, US

<sup>2</sup> Laboratory Medicine, University of California San Francisco, US

<sup>3</sup> Department of Pathology & Laboratory Medicine, Mayo Clinic, US

<sup>4</sup> Research and development, Laboratory Corporation of America, US

<sup>5</sup> Department of pathology, Johns Hopkins University School of Medicine, US

\*email: [wclarke@jhmi.edu](mailto:wclarke@jhmi.edu)

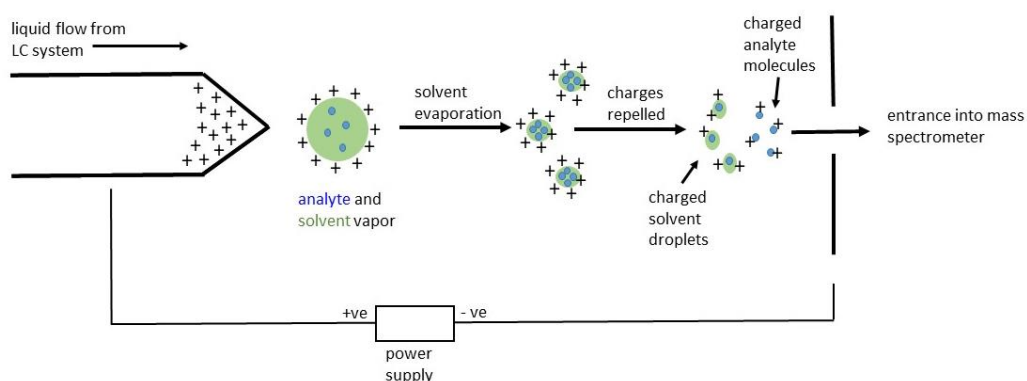

**Supplementary Figure 1.** Visualization of the electrospray process for singly charged molecular ions generated by desolvation, ion evaporation and declustering of ion-solvent clusters prior to mass filtering.

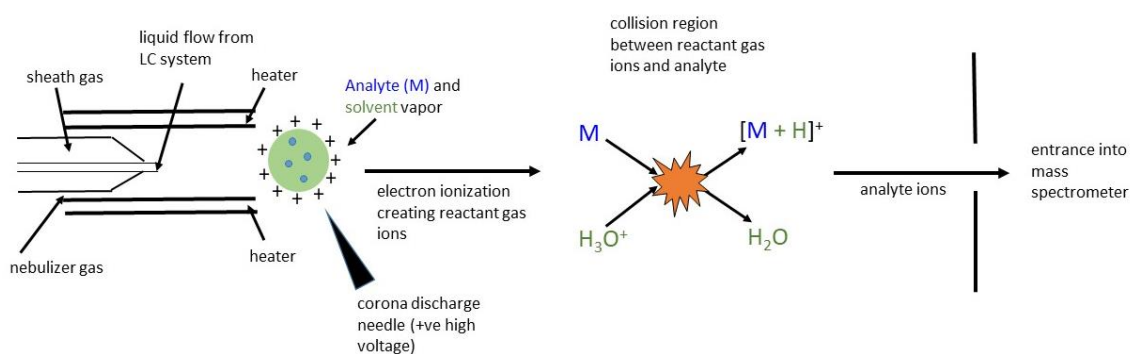

**Supplementary Figure 2.** Visualization of the atmospheric chemical ionization process for positively charged molecular ions generated by sample evaporation, ionization of reagent gas, proton addition as a gas-phase cluster, subsequent declustering and mass analysis.
